# Supplementary material for: Bioevaluation of Ranatuerin-2Pb from the Frog Skin Secretion of Rana pipiens and Its Truncated Analogues
Source: PubMed Central journal article supplement (PMC6627226; doi:10.3390/biom9060249), 2019-06-25
Supplement: biomolecules-09-00249-s001.pdf [file biomolecules-09-00249-s001.pdf]

# Bio-evaluation of Ranatuerin-2Pb from the Frog Skin Secretion of *Rana Pipiens* and its Truncated Analogues

Supplement materials:

```

M F T L K K S L L L F F F L G T I .
1 ATGTTACCT TGAAGAAATC CCTGTTACTC TTTTCTTTC TTGGGACCAT
TACAAGTGGG ACTTCTTTAG GGACAATGAG AAAAAGAAAG AACCTGGTA
. S L S L C E Q E R G A D D D Q G E
51 CTCTTATCT CTCTGTGAGC AAGAGAGAGG TGCCGATGAC GACCAAGGGG
GAGGAATAGA GAGACACTCG TTCTCTCTCC ACGGCTACTG CTGGTTCCCC
. V Q Q E V K R S F L T T V K K L
101 AAGTACAGCA AGAAGTAAAA AGAAGTTTCC TTAATACAGT CAAGAAGTTG
TTCATGTCGT TCTTCATTTT TCTTCAAAGG AATGATGTCA GTTCTTCAAC
V T N L A A L A G T V I D T I K C .
151 GTTACCAATC TGGCAGCACT GGCAGGGACT GTGATAGATA CCATAAAATG
CAATGGTTAG ACCGTCGTGA CCGTCCCTGA CACTATCTAT GGTATTTTAC
. K V T G G C R T *
201 TAAAGTTACT GGAGGATGTA GAACGTGAAT TGGAAGTCAT CTGATGTGGC
ATTTCAATGA CCTCCTACAT CTGCACTTA ACCTTCAGTA GACTACACCG
251 GTTCATTTAG CTAAATGCTA CATGTCTAAT AAAAAATACA AATTTACAAA
CAAGTAAATC GATTTACGAT GTACAGATTA TTTTATATGT TTAAAGTGTT
301 AAAAAAAAAA AAAAAAA
TTTTTTTTTT TTTTTT
```

**Figure S1.** Nucleotide and corresponding translated open-reading frame of precursor cDNA cloned from the skin secretion of Chinese piebald odorous frog cDNA library that encodes ranatuerin-2Pb. Putative signal peptide is double-underlined, mature peptide is single-underlined and stop codon is marked by asterisk.

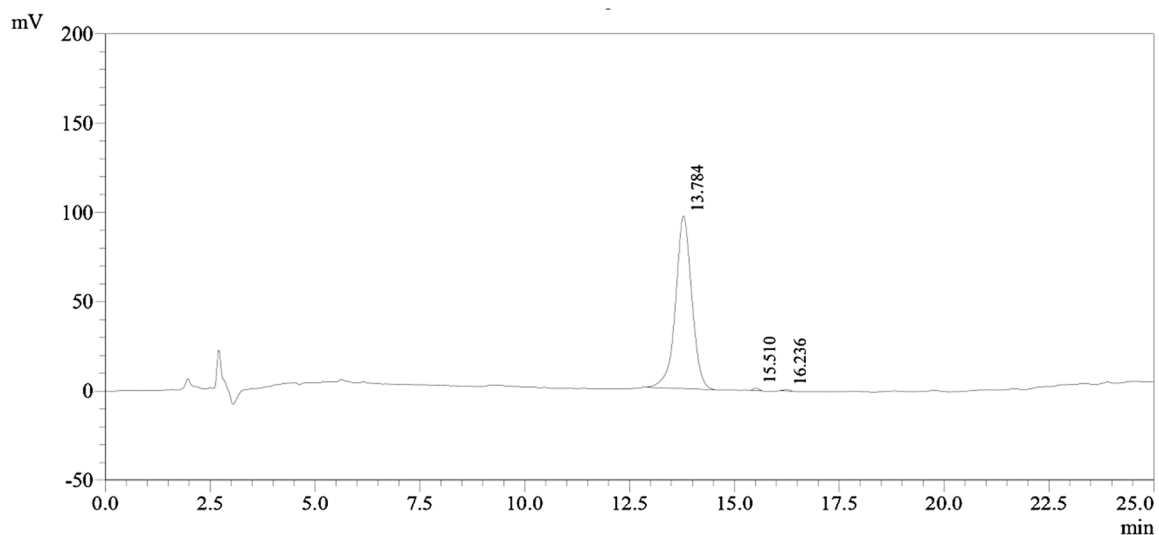

1 Det.A Ch1 / 220nm

Peak Table

Detector A Ch1 220nm

| Peak# | Ret. Time | Area    | Height | Area %  |
|-------|-----------|---------|--------|---------|
| 1     | 13.784    | 2600668 | 96731  | 99.271  |
| 2     | 15.510    | 12142   | 1449   | 0.463   |
| 3     | 16.236    | 6945    | 783    | 0.265   |
| Total |           | 2619755 | 98963  | 100.000 |

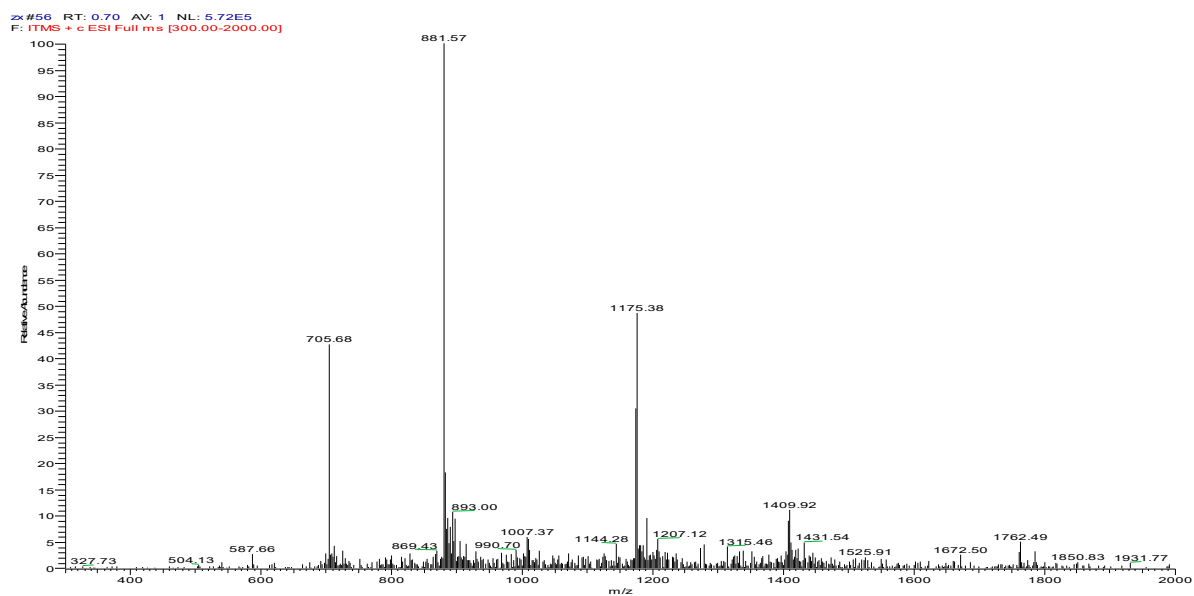

(a)

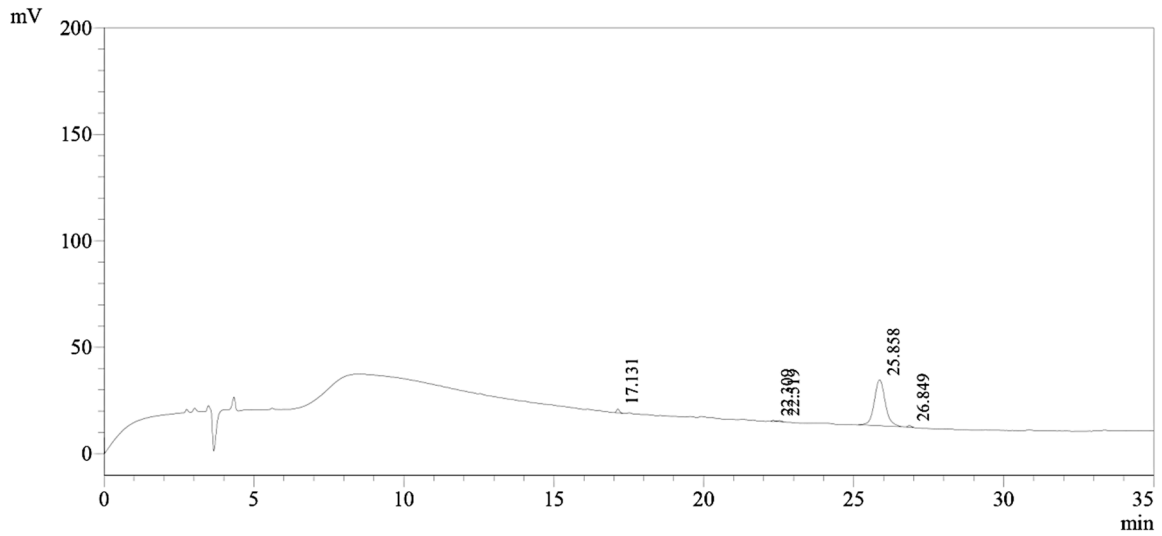

1 Det.A Ch1 / 220nm

Peak Table

Detector A Ch1 220nm

| Peak# | Ret. Time | Area   | Height | Area %  |
|-------|-----------|--------|--------|---------|
| 1     | 17.131    | 12570  | 1835   | 2.195   |
| 2     | 22.309    | 3632   | 459    | 0.634   |
| 3     | 22.519    | 4692   | 505    | 0.819   |
| 4     | 25.858    | 545334 | 21581  | 95.228  |
| 5     | 26.849    | 6436   | 824    | 1.124   |
| Total |           | 572664 | 25205  | 100.000 |

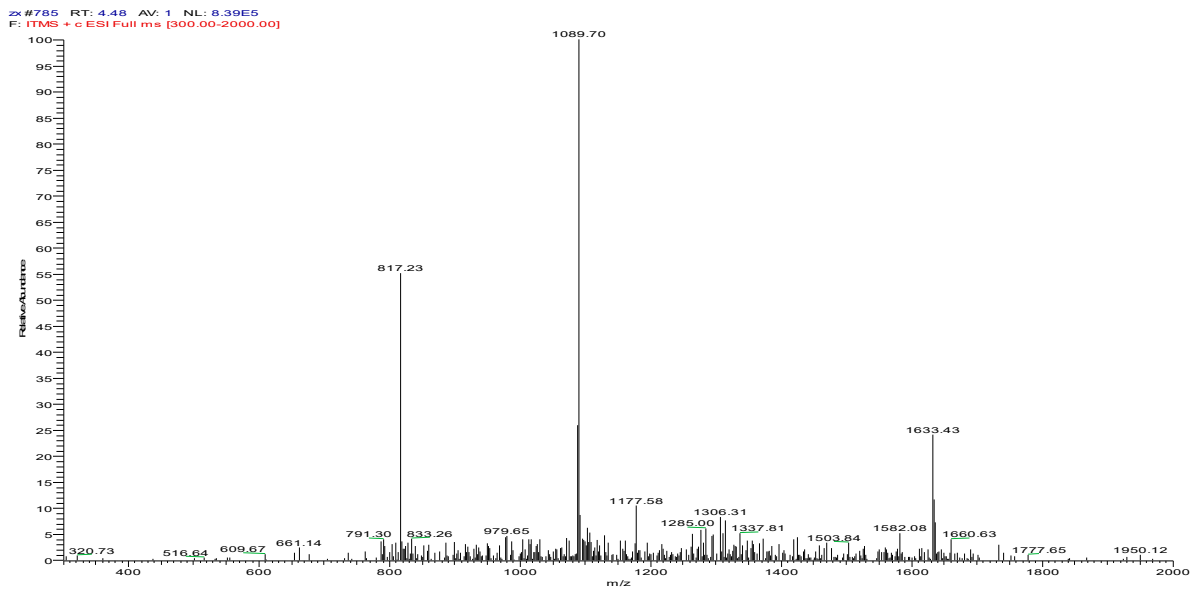

(b)

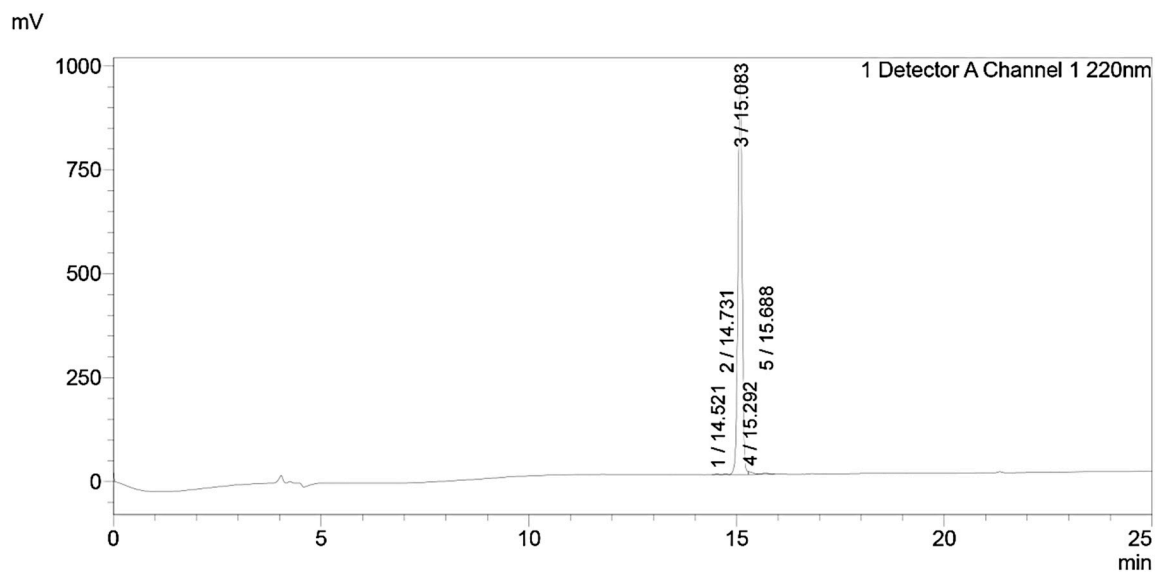

<Peak Table>

Detector A Channel 1 220nm

| Peak# | Ret. Time | Area    | Height | Area%   |
|-------|-----------|---------|--------|---------|
| 1     | 14.521    | 11565   | 2106   | 0.172   |
| 2     | 14.731    | 12738   | 2125   | 0.189   |
| 3     | 15.083    | 6632957 | 947951 | 98.515  |
| 4     | 15.292    | 45654   | 6695   | 0.678   |
| 5     | 15.688    | 29999   | 3834   | 0.446   |
| Total |           | 6732913 | 962711 | 100.000 |

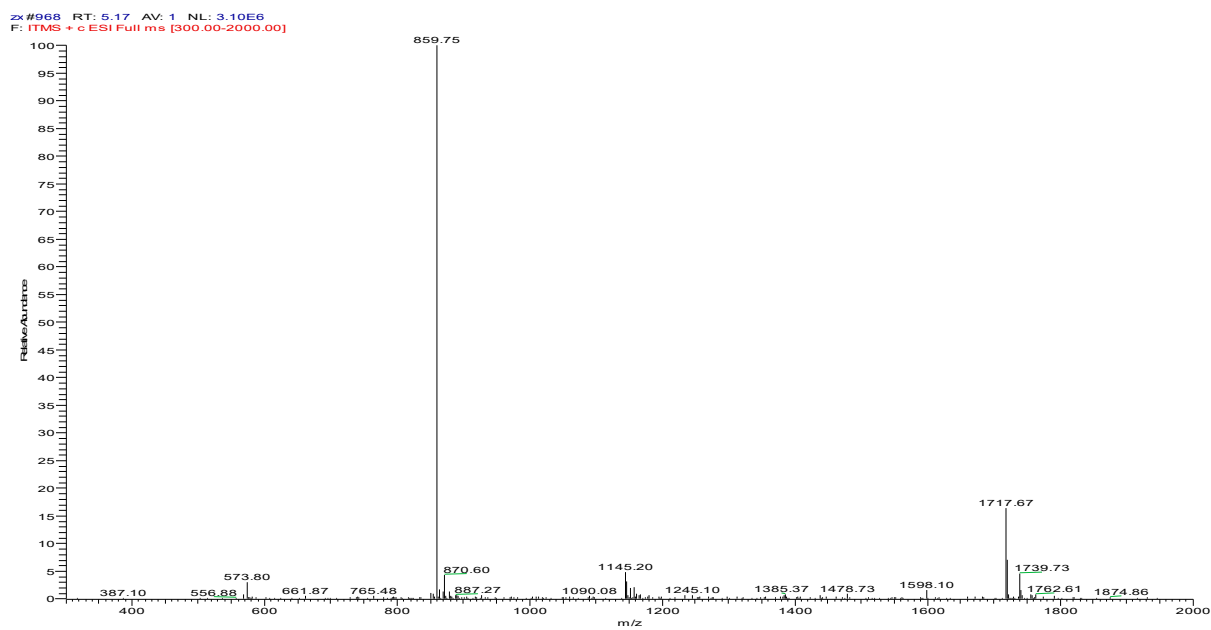

(c)

Figure S2. RP-HPLC chromatogram and mass spectrums of synthesised peptides, ranatuerin-2Pb (a), RPa (b) and RPb (c).
